# Supplementary material for: Nanobubbles can modulate microbial communities and sedimentary ecosystem during the treatment of pond water
Source: Royal Society of Chemistry journal article supplement (doi:10.1039/d3ew00257h), 2023-01-01
Supplement: d3ew00257h1.pdf [file d3ew00257h1.pdf]

## *Supplementary Material*

### **Nanobubble can modulate microbial communities and sedimentary ecosystem in pond water treatment**

**Yadi Wang**<sup>1,2†</sup>, **Jin Zheng**<sup>3†</sup>, **Jie Cheng**<sup>3†#</sup>, **Runlong Zhou**<sup>2</sup>, **Xueling Li**<sup>1,4\*</sup>, **Jun Hu**<sup>3</sup>, **Junhong Lü**<sup>1,2,3\*</sup>

<sup>1</sup>Jinan Microecological Biomedicine Shandong Laboratory, Jinan 250000, China

<sup>2</sup>College of Pharmacy, Binzhou Medical University, Yantai 264003, China

<sup>3</sup>Shanghai Institute of Applied Physics, Chinese Academy of Sciences, Shanghai 201800, China

<sup>4</sup>Shanghai University of Medicine & Health Sciences, Shanghai 201318, China

#Current address: Institute of Special Environmental Medicine and Co-Innovation Center of Neuroregeneration, Nantong University, Nantong 226019, China.

**\* Correspondence:**

Junhong Lü  
[lvjunhong@jnl.ac.cn](mailto:lvjunhong@jnl.ac.cn)

Xueling Li  
[lixl@sumhs.edu.cn](mailto:lixl@sumhs.edu.cn)

**1. Supplementary Figures**

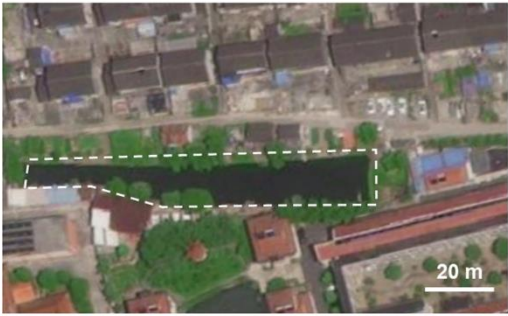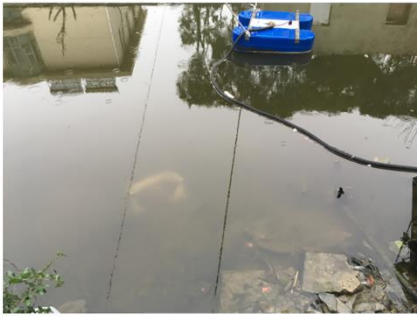

**Supplementary Figure 1.** Micro/nano-bubble treated pond aquatic ecosystem mentioned in this study.

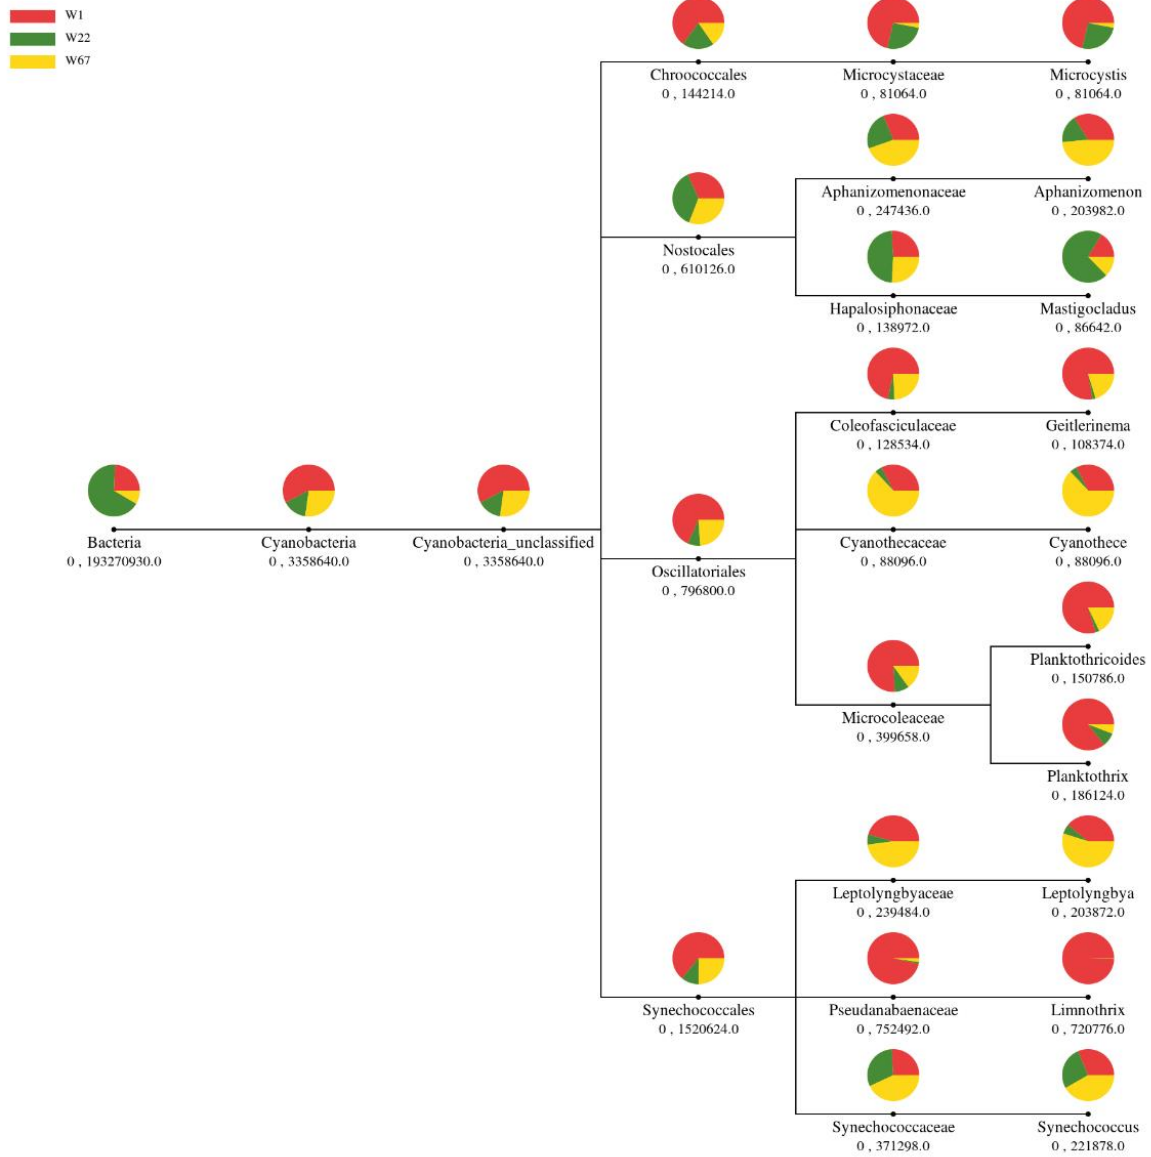

**Supplementary Figure 2.** Taxonomy analysis tree of microorganisms in water at 1st, 22nd and 67th days of NBS' treatment.

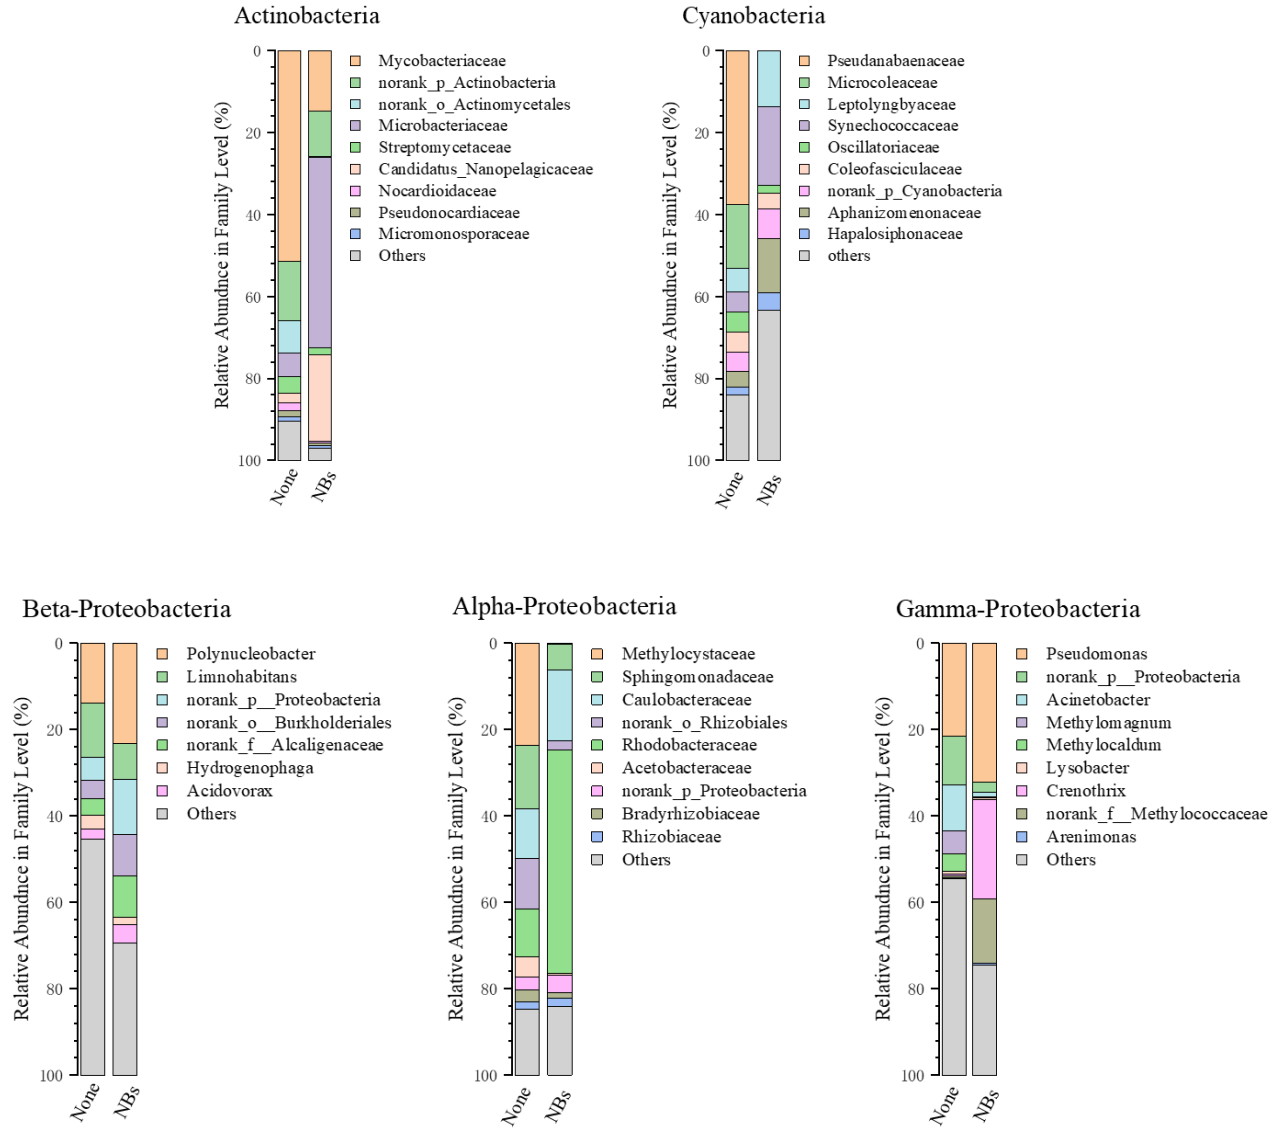

**Supplementary Figure 3.** The effect of NBs on the three most abundant phyla (Actinobacteria, Proteobacteria and Cyanobacteria) at the genus level.

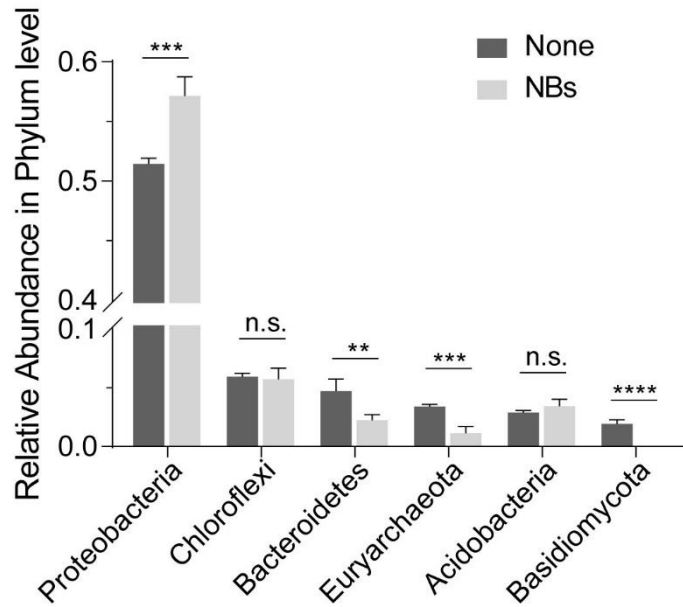

**Supplementary Figure 4.** Significance test on six most abundant phyla in sediment before and after NBs treatment. *T*-test was carried out and four replicates each group. \*\*\*\*:  $P < 0.0001$ ; \*\*\*:  $P < 0.001$ ; \*\*:  $P < 0.01$ ; \*:  $P < 0.05$ ; n.s.: no significance.

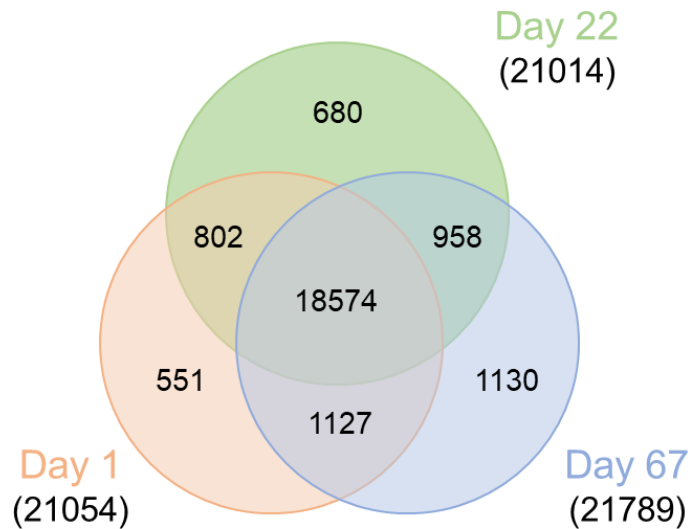

**Supplementary Figure 5.** The Venn diagram of microbial communities in sediment under different NBs treatment days.

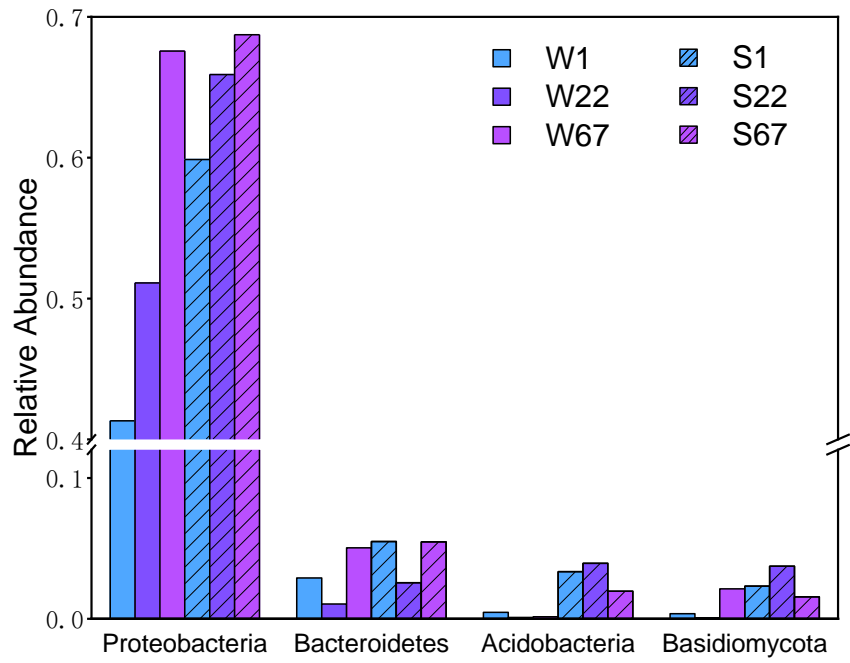

**Supplementary Figure 6.** Variation of the relative abundance of bacteria shared by pond water and sediments over time. The colors indicate different processing days (1, 22 and 67 days). The left three columns of each bacteria represent the water and the right three ones represents the sediment.

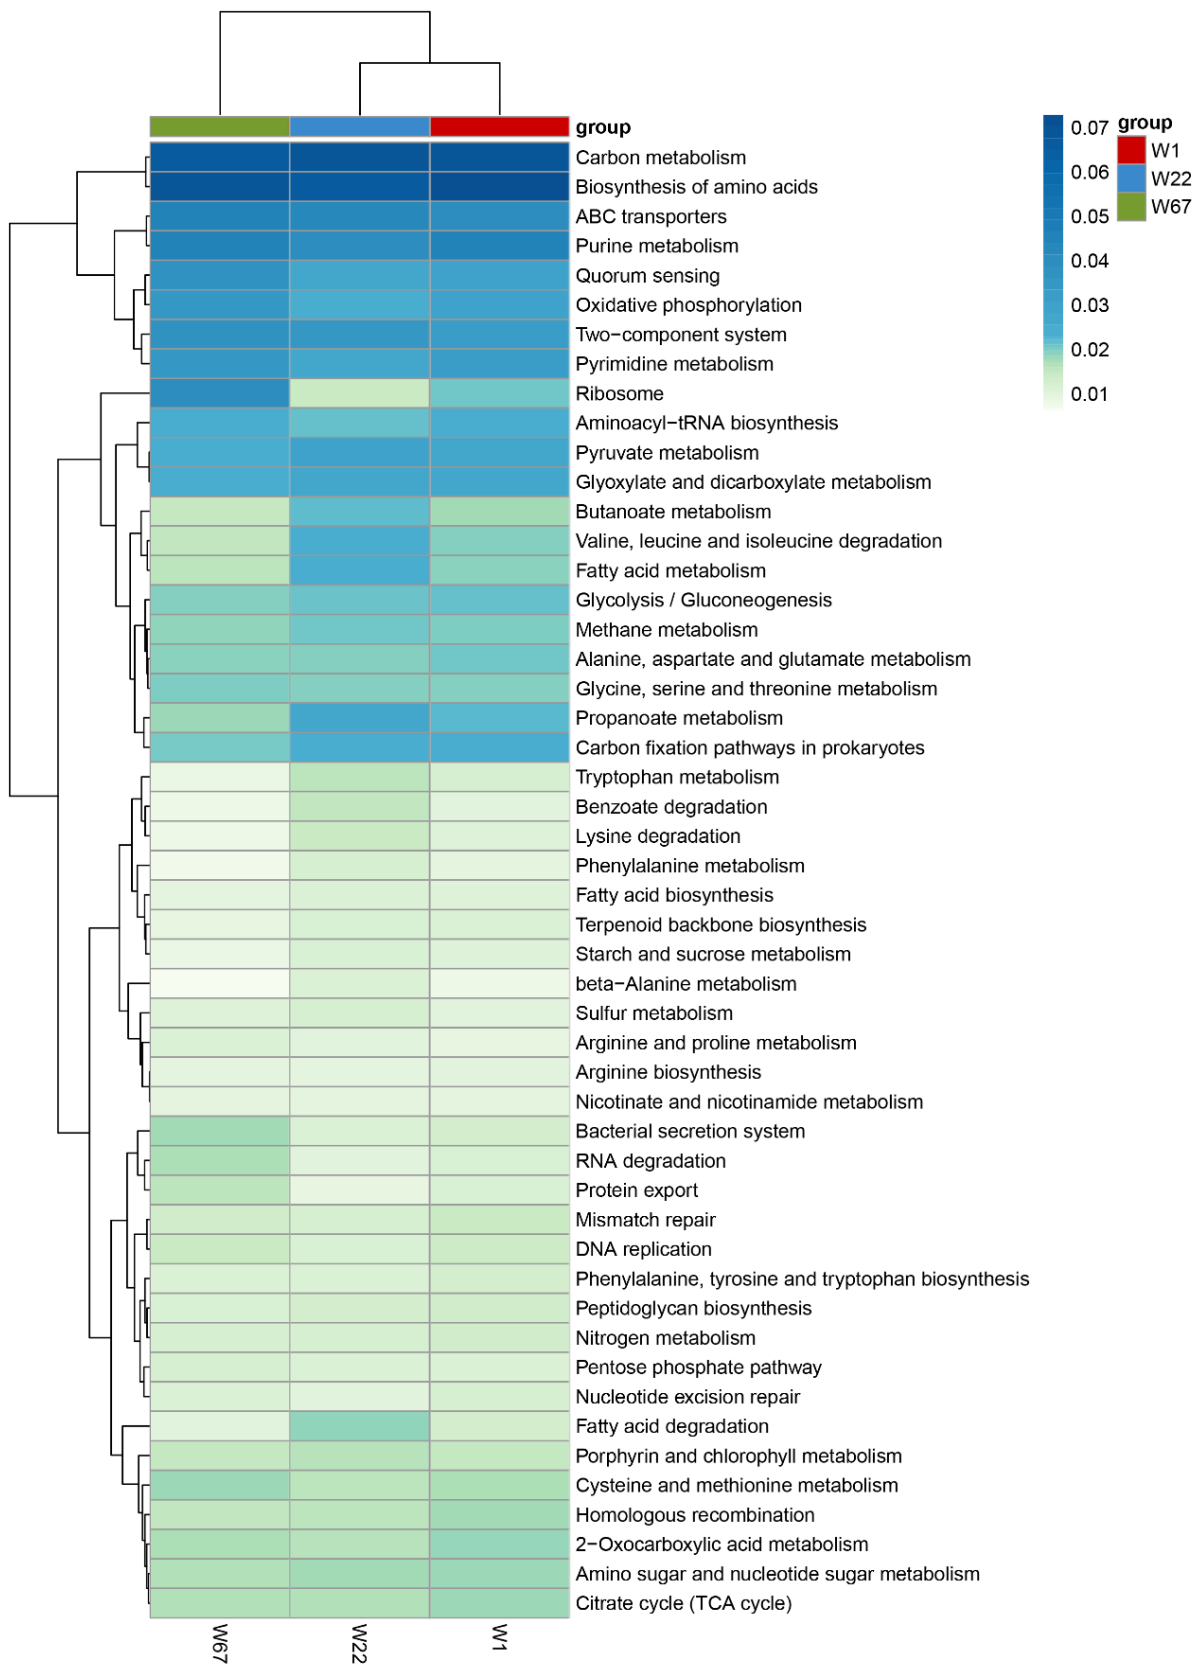

**Supplementary Figure 7.** Heatmap of KEGG pathway of microorganisms in pond water.

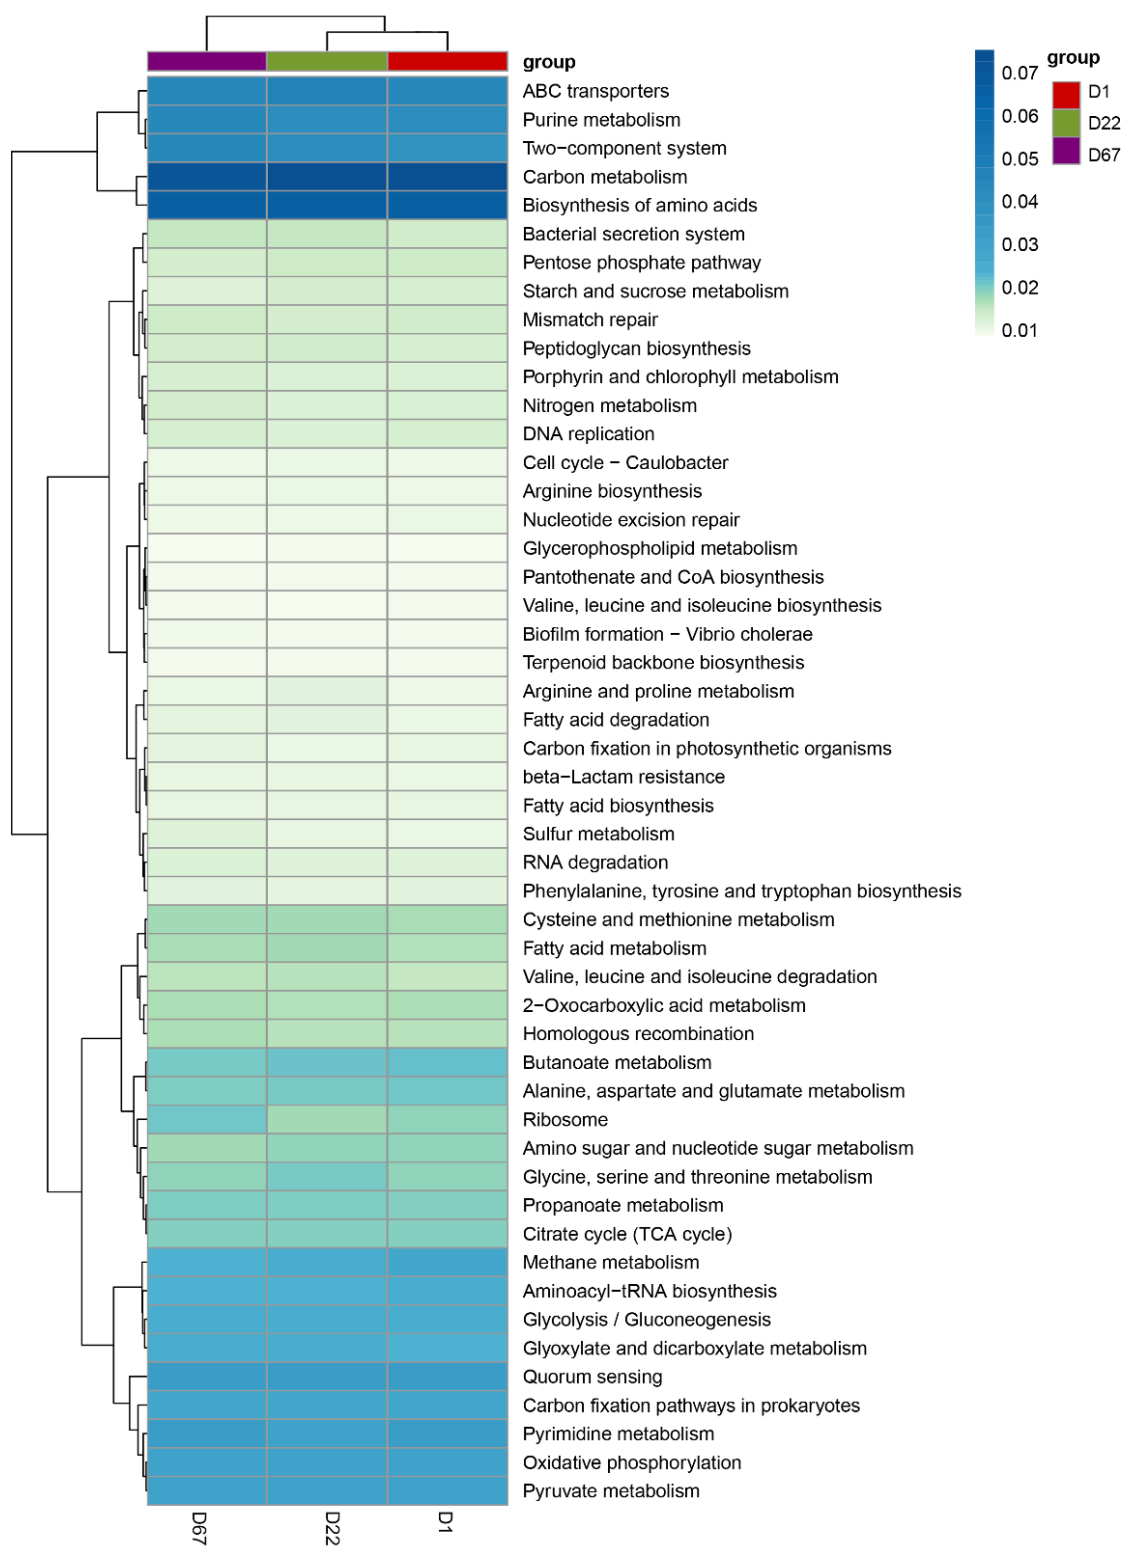

**Supplementary Figure 8.** Heatmap of KEGG pathway of microorganisms in pond sediment.



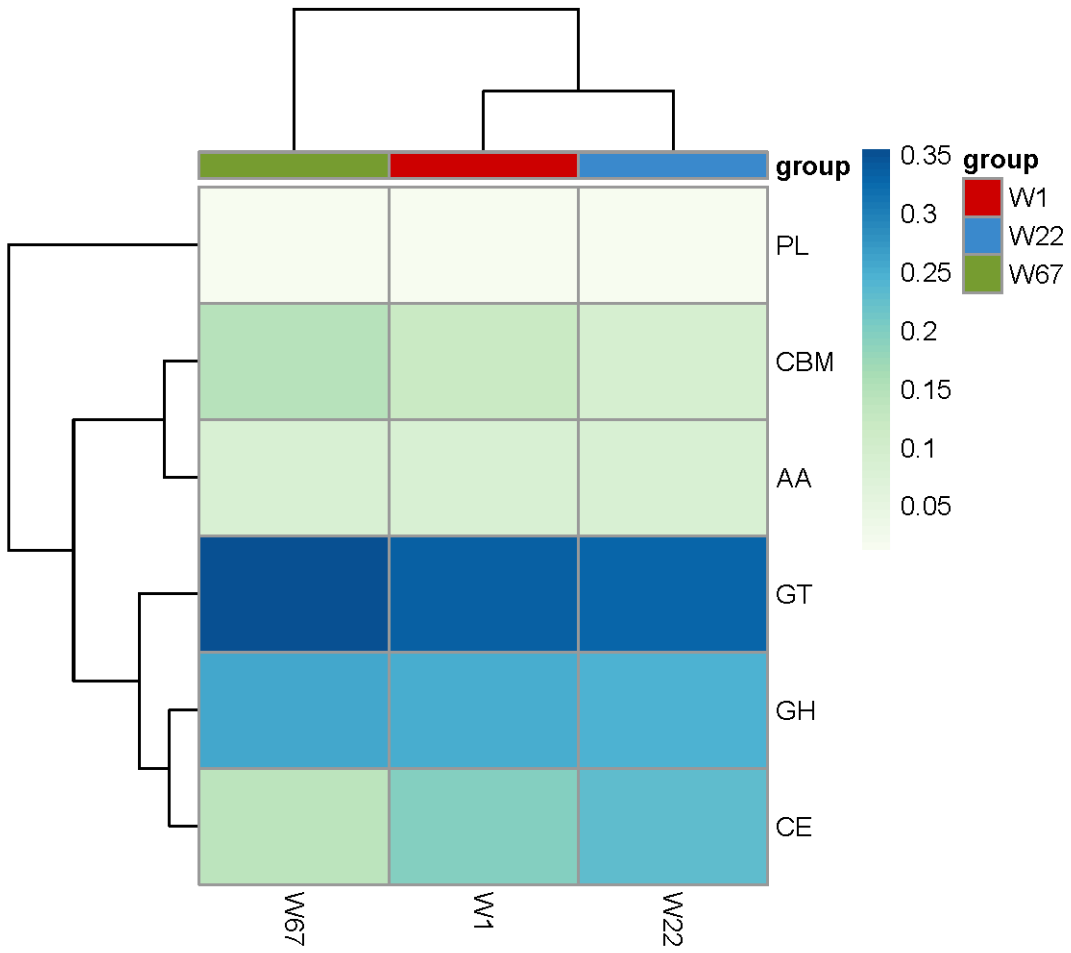

**Supplementary Figure 9.** Heatmap of Carbohydrate-active enzyme annotation in Water.

## 2. Supplementary Tables

**Supplementary Table 1.** Base mass distribution of sequence

| Source   | Day | Q20 (%) | Q30 (%) | CG(%) |
|----------|-----|---------|---------|-------|
| Sediment | 1   | 98.69   | 95.95   | 60.81 |
|          | 22  | 98.01   | 94.63   | 61.74 |
|          | 67  | 97.47   | 92.82   | 59.26 |
| Water    | 1   | 98.21   | 94.97   | 52.33 |
|          | 22  | 97.97   | 94.69   | 60.4  |
|          | 67  | 96.83   | 91.67   | 49.05 |

Q20(%): the percentage of bases with a quality score of more than 20; Q30(%): the percentage of bases with a quality score of more than 30; CG(%): the percentage of CG base pairs to total base pairs.

**Supplementary Table 2.** Obtained and processed genetic data

| Source   | Day | Raw reads | Total bases<br>(bp) | Clean reads | Total bases<br>(bp) | Contigs | ORFs    | Non-<br>redundant |
|----------|-----|-----------|---------------------|-------------|---------------------|---------|---------|-------------------|
| Sediment | 1   | 130036994 | 19505549100         | 130011426   | 19477734092         | 565798  | 972510  | 5738386           |
|          | 22  | 172444976 | 25866746400         | 172397638   | 25830172658         | 942956  | 1675547 |                   |
|          | 67  | 100481522 | 15072228300         | 100474528   | 15057616428         | 583451  | 999815  |                   |
| Water    | 1   | 167706948 | 25156042200         | 167682312   | 25101077476         | 713353  | 1193498 | 2665795           |
|          | 22  | 258667604 | 38800140600         | 258615468   | 38745501439         | 615377  | 1214061 |                   |
|          | 67  | 85807464  | 12871119600         | 85802430    | 12848391138         | 276521  | 551746  |                   |

Clean reads: filtered data; Contigs: spliced sequence; ORFs: open reading frames predicted by the comparison database; Non-redundant: non-redundant gene set.

**Supplementary Table 3.** Paired *t*-test at the phylum level based on the family abundance along with NBs' treatment for 1, 22 and 67 days

|          | Phyla          | Day 1 vs. Day 22 | Day 22 vs. Day 67 | Day 1 vs. Day 67 |
|----------|----------------|------------------|-------------------|------------------|
| Water    | Actinobacteria | ****             | ****              | ****             |
|          | Cyanobacteria  | ****             | **                | n.s.             |
|          | Proteobacteria | ****             | ****              | ****             |
| Sediment | Proteobacteria | n.s.             | n.s.              | ***              |
|          | Chloroflexi    | n.s.             | **                | ****             |
|          | Bacteroidetes  | ****             | ****              | n.s.             |
|          | Euryarchaeota  | ****             | **                | ****             |
|          | Acidobacteria  | ****             | ****              | n.s.             |
|          | Planctomycetes | *                | **                | **               |

\*\*\*\*: P<0.0001; \*\*\*: P<0.001; \*\*: P<0.01; \*: P<0.05; n.s.: no significance

**Supplementary Table 4.** The relative abundance of most abundant classes of Proteobacteria in total community in water samples

| Day                  | 1      | 22     | 67     |
|----------------------|--------|--------|--------|
| Alpha-Proteobacteria | 9.72%  | 22.92% | 19.10% |
| Beta-Proteobacteria  | 25.05% | 20.10% | 29.44% |
| Gamma-Proteobacteria | 5.34%  | 7.29%  | 17.66% |

**Supplementary Table 5.** The Shannon diversity index of microbial species in pond water after continuously NBs' treatment for 1, 22 and 67 days

| Source | Day | Shannon Index |
|--------|-----|---------------|
| Water  | 1   | 6.83          |
|        | 22  | 5.94          |
|        | 67  | 6.60          |
